# Supplementary material for: Depletion of skeletal muscle satellite cells attenuates pathology in muscular dystrophy
Source: PubMed Central journal article supplement (PMC9135721; doi:10.1038/s41467-022-30619-7), 2022-05-26
Supplement: 41467_2022_30619_MOESM1_ESM.pdf [file 41467_2022_30619_MOESM1_ESM.pdf]

## **Supplementary Information**

### **Deletion of skeletal muscle satellite cells attenuates pathology in muscular dystrophy**

Justin G. Boyer<sup>1,2</sup>, Jiuzhou Huo<sup>1</sup>, Sarah Han<sup>1</sup>, Julian R. Havens<sup>1,2</sup>, Vikram Prasad<sup>1</sup>, Brian L. Lin<sup>3</sup>, David A Kass<sup>3</sup>, Taejeong Song<sup>4</sup>, Sakthivel Sadayappan<sup>4</sup>, Ramzi J. Khairallah<sup>5</sup>, Christopher W. Ward<sup>6</sup>, Jeffery D. Molkentin<sup>1,2\*</sup>

<sup>1</sup>Department of Pediatrics, Cincinnati Children's Hospital Medical Center, Cincinnati, OH, 45229 USA

<sup>2</sup>Department of Pediatrics, University of Cincinnati, Cincinnati, OH, 45229, USA

<sup>3</sup>Division of Cardiology, Johns Hopkins Medical Institutions, Baltimore, MD 21205. USA

<sup>4</sup>Division of Cardiovascular Health and Disease, Department of Internal Medicine, University of Cincinnati, OH 45267, USA

<sup>5</sup>Myologica, LLC, New Market, MD 21774, USA

<sup>6</sup>Department of Orthopedics and Center for Biomedical Engineering and Technology (BioMET), University of Maryland School of Medicine, Baltimore, MD

**Supplementary Figures 1-5**

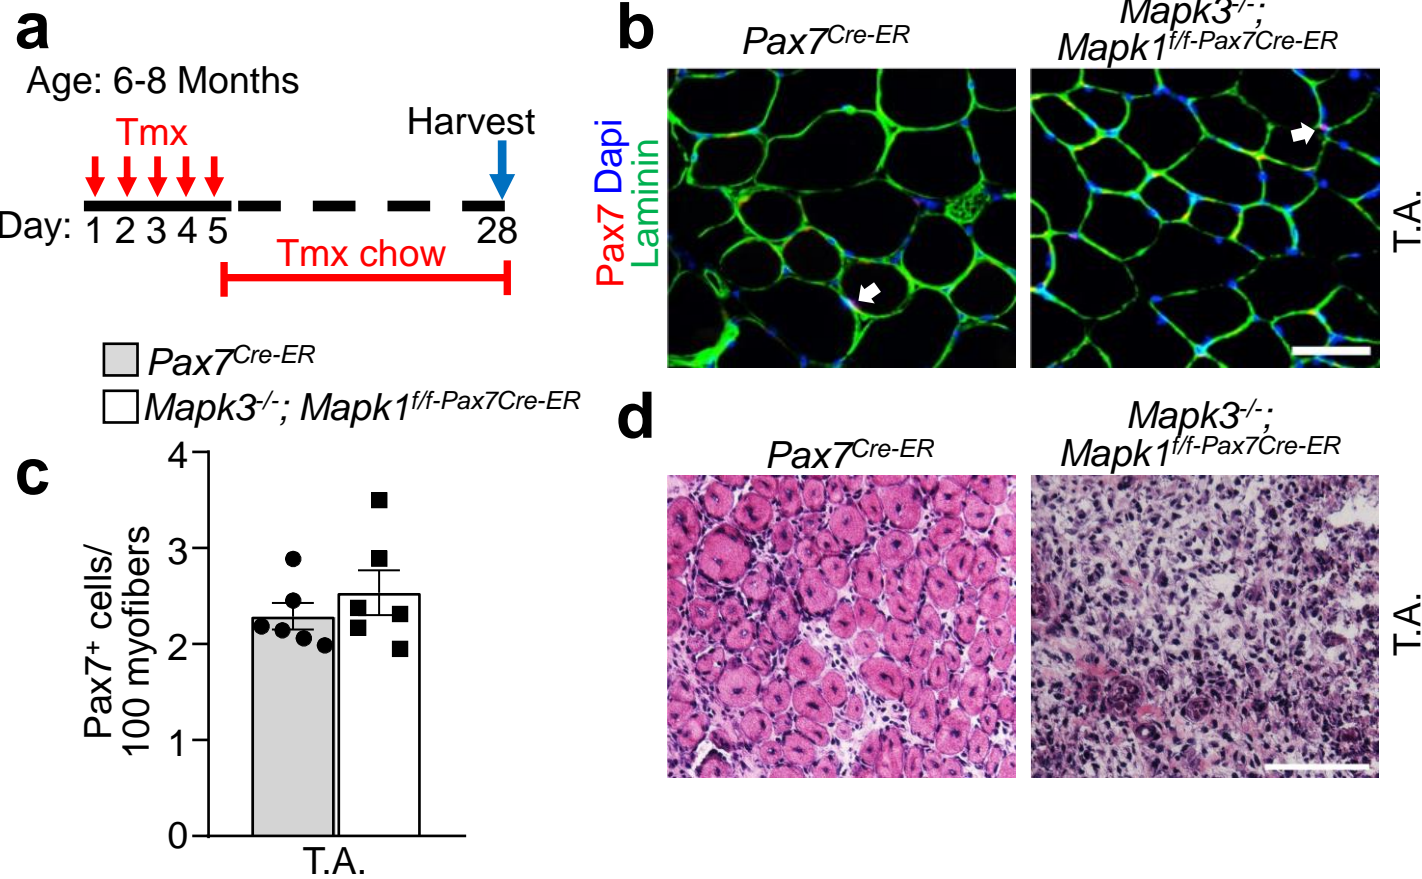

**Supplementary Fig. 1. Normal satellite cells numbers in adult mice lacking *Mapk3* and *Mapk1*.** **a**, Schematic representation of the tamoxifen (tmx) treatment regimen. Adult mice (6-8-month-old) received a daily tmx injection for 5 consecutive days and were subsequently placed on tmx chow after for 3 weeks. **b**, Representative immunostained sections of the tibialis anterior (TA) muscle for Pax7 (arrows) and laminin (green). Dapi stained nuclei are in blue. Scale bar = 50  $\mu$ m. **c**, Quantification of Pax7<sup>+</sup> cells in TA muscle sections from mice of the indicated genotypes. n = 6 mice per group. Data represent mean  $\pm$  SEM. **d**, Representative H&E-stained sections of the TA muscle 7 days post CTX injury. Scale bar = 100  $\mu$ m. Samples from 3 different mice were analyzed.

## Supplementary Figure 2

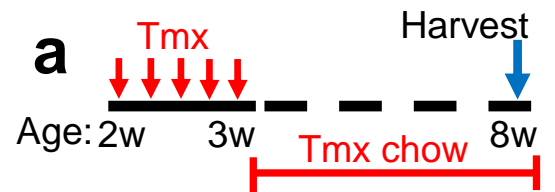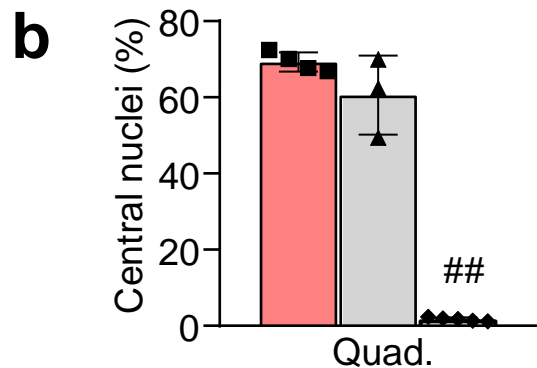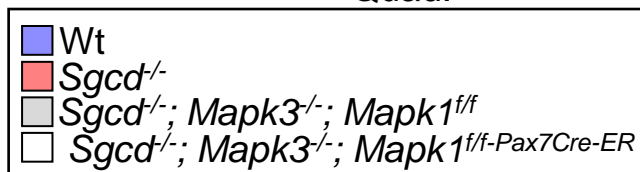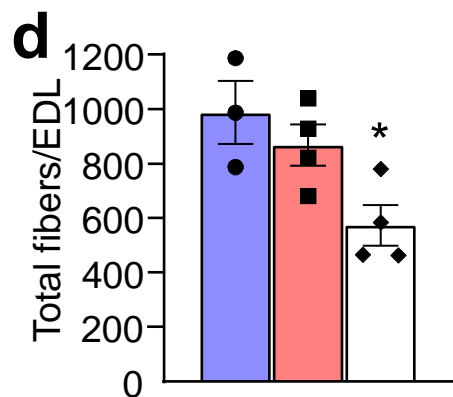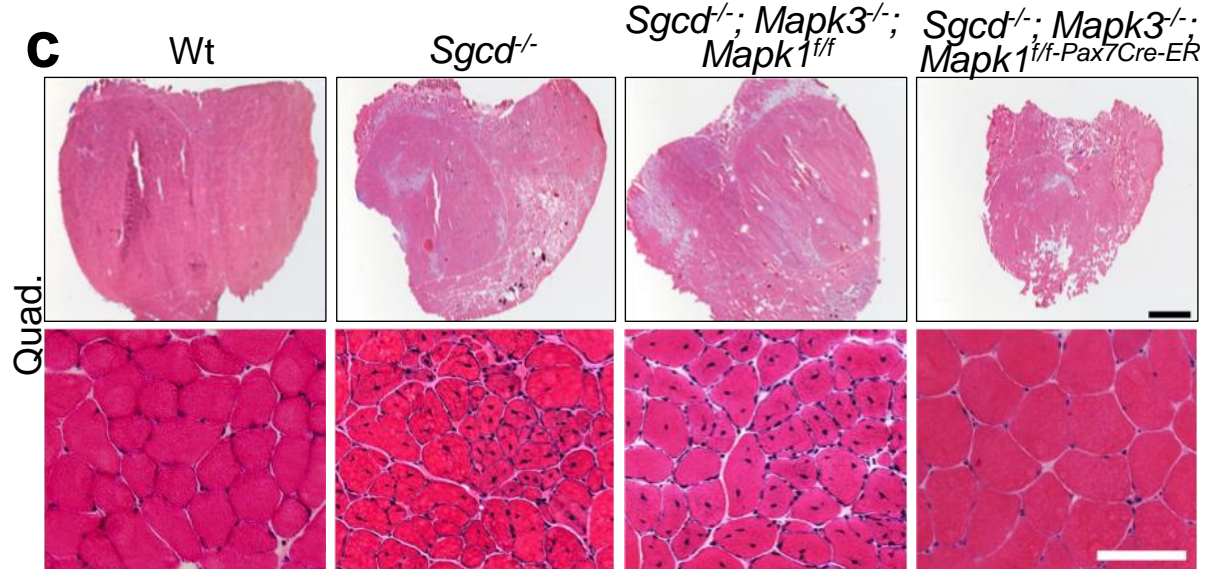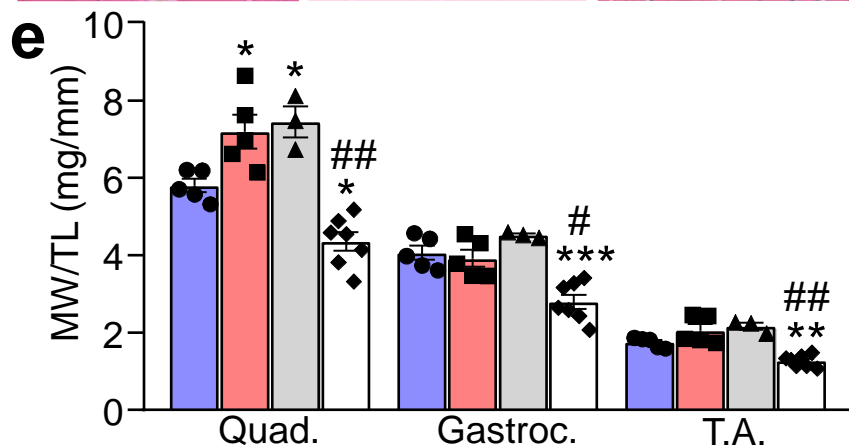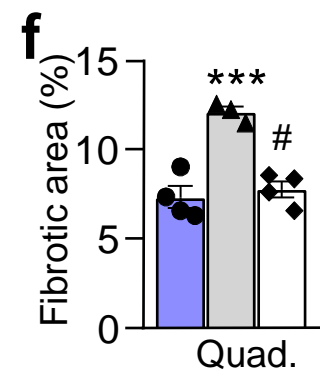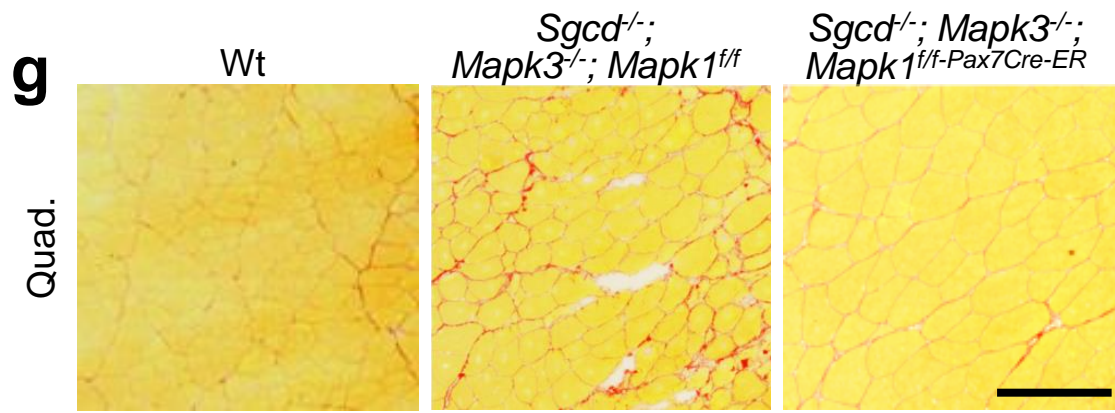

**Supplementary Fig. 2. Satellite cell depletion prior to myofiber degeneration in *Sgcd*<sup>-/-</sup> mice.**

**a**, Schematic of the tamoxifen (tmx) treatment. Two-week-old mice received a daily tmx injection for five consecutive days and were subsequently placed on tmx chow after weaning. **b**, Quantification of the number of myofibers with centrally located nuclei in quad muscle sections from mice of the indicated genotypes. n = 4 *Sgcd*<sup>-/-</sup> mice; n = 3 *Sgcd*<sup>-/-</sup>; *Mapk3*<sup>-/-</sup>; *Mapk1*<sup>ff</sup> mice and n = 5 *Sgcd*<sup>-/-</sup>; *Mapk3*<sup>-/-</sup>; *Mapk1*<sup>ff-Pax7Cre-ER</sup> mice. One-way ANOVA with Tukey's multiple comparisons test was used to determine significance, ##P < 0.001 vs disease controls. **c**, Representative H&E-stained histological sections of the quad muscle from mice of the indicated genotypes. Scale bars = 100 μm. **d**, Quantification of the total myofibers present in the extensor digitorum longus (EDL) muscle from 2-month-old mice of the indicated genotypes. n = 3 Wt mice; n = 4 *Sgcd*<sup>-/-</sup>; *Mapk3*<sup>-/-</sup>; *Mapk1*<sup>ff</sup> mice and n = 4 *Sgcd*<sup>-/-</sup>; *Mapk3*<sup>-/-</sup>; *Mapk1*<sup>ff-Pax7Cre-ER</sup> mice. A 1-way ANOVA with Tukey's multiple comparisons test was used to determine significance, \*P < 0.05 vs wt. **e**, Muscle weights (MW) normalized to tibia length (TL) from mice of the indicated genotypes at 2 months of age. n = 5 Wt mice; n = 5 *Sgcd*<sup>-/-</sup> mice, n = 3 *Sgcd*<sup>-/-</sup>; *Mapk3*<sup>-/-</sup>; *Mapk1*<sup>ff</sup> mice and n = 7 *Sgcd*<sup>-/-</sup>; *Mapk3*<sup>-/-</sup>; *Mapk1*<sup>ff-Pax7Cre-ER</sup> mice. A 1-way ANOVA with Tukey's multiple comparisons test was used to determine significance, \*\*\*P < 0.001 vs Wt, \*\*P < 0.01 vs Wt, \*P < 0.05 vs Wt, #P < 0.01 vs disease controls, ##P < 0.001 vs disease controls. **f**, Quantification of the fibrosis present from images as shown in "g" from quad muscle sections from mice of the indicated genotypes. n = 4 Wt mice; n = 3 *Sgcd*<sup>-/-</sup>; *Mapk3*<sup>-/-</sup>; *Mapk1*<sup>ff</sup> mice n = 4 *Sgcd*<sup>-/-</sup>; *Mapk3*<sup>-/-</sup>; *Mapk1*<sup>ff-Pax7Cre-ER</sup> mice. One-way ANOVA with Tukey's multiple comparisons test was used to determine significance, \*\*\*P < 0.001 vs Wt, #P = 0.01 vs disease control. **g**, Representative Picrosirius Red-stained histological sections of the quad muscle from mice of the indicated genotypes as quantified in "f". Scale bar = 100 μm. Data represent mean ± SEM for all graphs.

### Supplementary Figure 3

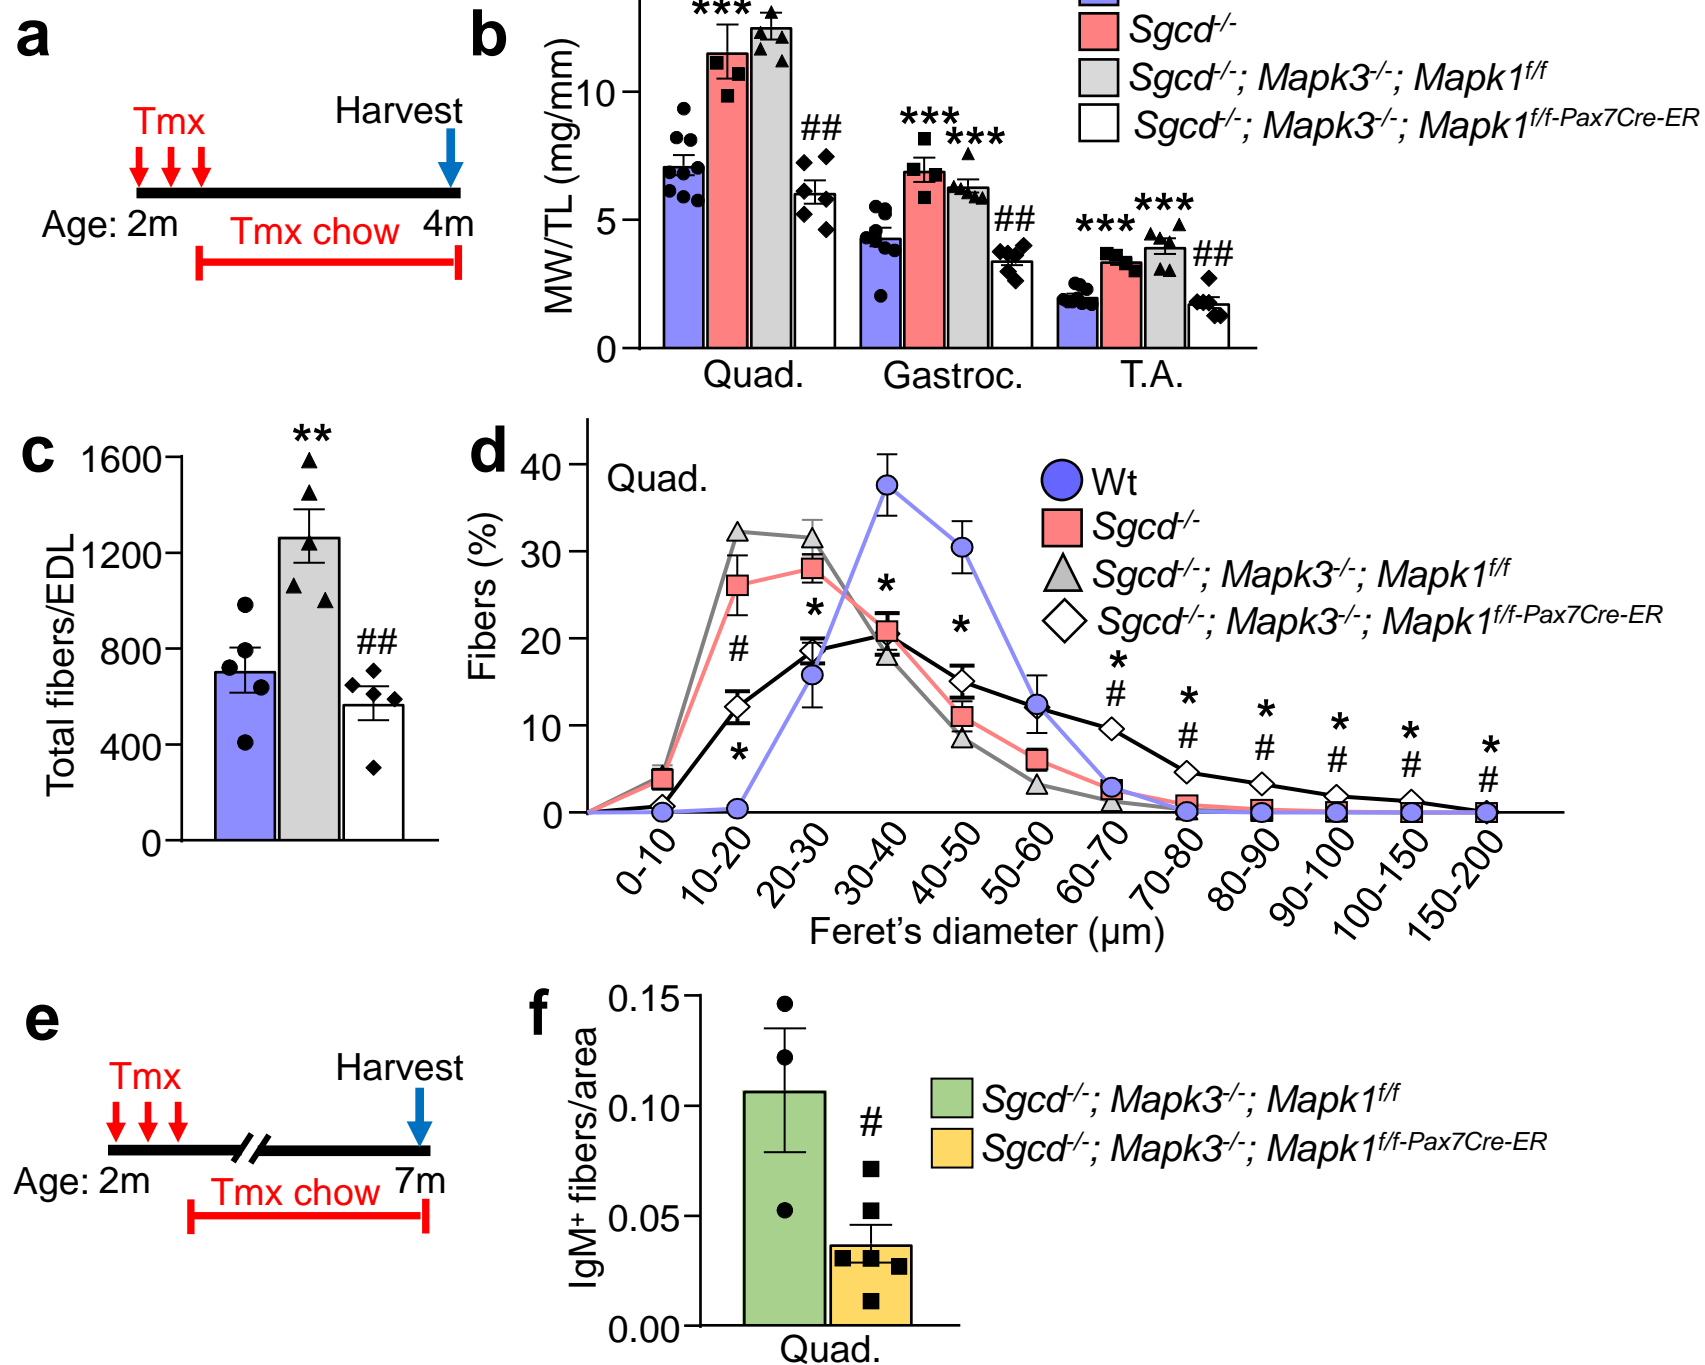

### Supplementary Fig. 3. Satellite cell depletion in *Sgcd*<sup>-/-</sup> mice.

**a**, Schematic representation of the tamoxifen (tmx) treatment regimen. Two-month-old mice received a daily tmx injection for five consecutive days and were subsequently placed on tmx chow thereafter. **b**, Muscle weights (MW) normalized to tibia length (TL) from mice of the indicated genotypes at 4 months of age. n = 8 wt mice; n = 4 *Sgcd*<sup>-/-</sup> mice; n = 6 *Sgcd*<sup>-/-</sup>; *Mapk3*<sup>-/-</sup>; *Mapk1*<sup>ff</sup> mice; n = 6 *Sgcd*<sup>-/-</sup>; *Mapk3*<sup>-/-</sup>; *Mapk1*<sup>ff/Pax7Cre-ER</sup> mice. A 1-way ANOVA with Tukey's multiple comparisons test was used to determine significance, \*\*\*P < 0.001 vs Wt, ##P < 0.001 vs disease controls. **c**, Quantification of the total myofibers present in the extensor digitorum longus (EDL) muscle from 4-month-old mice of the indicated genotypes. n = 5 mice for all genotypes. A 1-way ANOVA with Tukey's multiple comparisons test was used to determine significance, \*\*P < 0.01 vs Wt, ##P < 0.001 vs *Sgcd*<sup>-/-</sup>; *Mapk3*<sup>-/-</sup>; *Mapk1*<sup>ff</sup>. **d**, Minimal feret's myofiber diameter distribution from the quad muscle of 4-month-old mice with the indicated genotypes. n = 4 Wt mice; n = 4 *Sgcd*<sup>-/-</sup> mice; n = 3 *Sgcd*<sup>-/-</sup>; *Mapk3*<sup>-/-</sup>; *Mapk1*<sup>ff</sup> mice and n = 3 *Sgcd*<sup>-/-</sup>; *Mapk3*<sup>-/-</sup>; *Mapk1*<sup>ff/Pax7Cre-ER</sup> mice. A 1-way ANOVA with Tukey's multiple comparisons test was used to determine significance, \*P < 0.05 vs Wt, #P < 0.05 versus disease controls. **e**, Schematic representation of the tmx treatment regimen. Two-month-old mice received a daily tmx injection for five consecutive days and were subsequently placed on tmx chow until 7 months of age. **f**, Quantification of immunoglobulin M (IgM) positive fibers in quad sections from mice of the indicated genotypes. n = 3 *Sgcd*<sup>-/-</sup>; *Mapk3*<sup>-/-</sup>; *Mapk1*<sup>ff</sup> mice and n = 6 *Sgcd*<sup>-/-</sup>; *Mapk3*<sup>-/-</sup>; *Mapk1*<sup>ff/Pax7Cre-ER</sup> mice. Significance was determined using a two-tailed Student's t-test, #P = 0.01. Data represent mean ± SEM for all graphs.



## Supplementary Figure 4

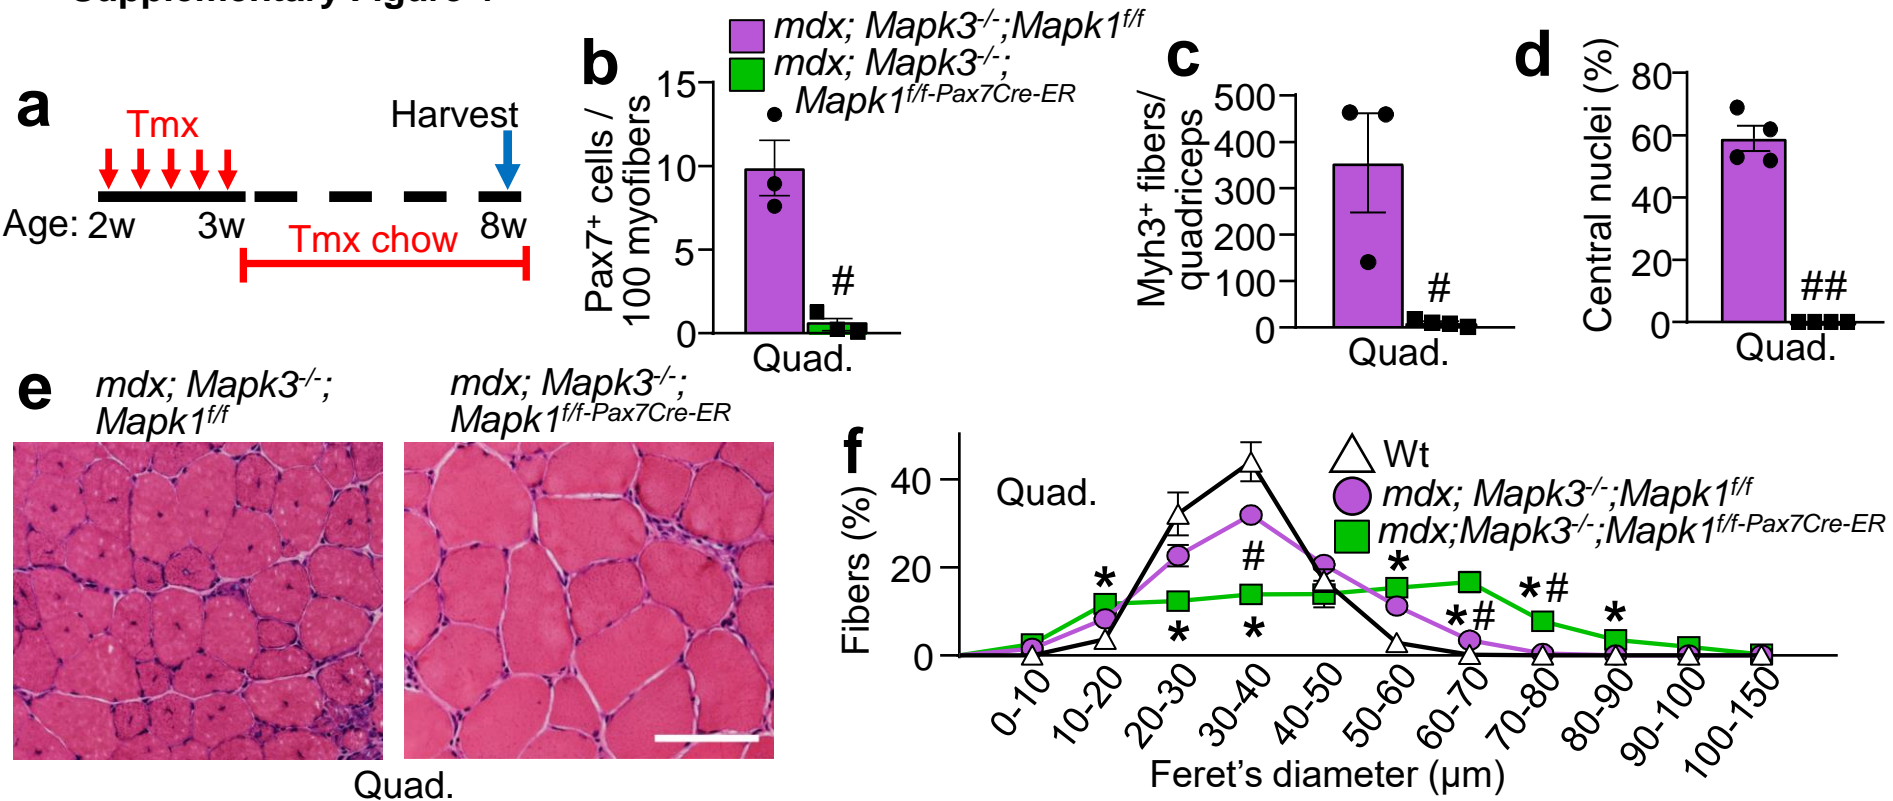

### Supplementary Fig. 4. Improved histopathology in *mdx* mice lacking satellite cells.

**a**, Schematic representation of the tamoxifen (tmx) treatment in *mdx* mice. Two-week-old mice received a daily tmx injection for 5 consecutive days and were subsequently placed on tmx chow after weaning until 8 weeks of age. **b**, Quantification of Pax7<sup>+</sup> satellite cell numbers from quadriceps (Quad.) sections of 8-week-old mice of the indicated genotypes. *n* = 3 mice per group. Significance was determined using a two-tailed unpaired Student's t-test, #*P* = 0.005. **c**, Quantification of the number of Myh3 positive fibers in quad muscle sections of mice with the indicated genotypes. *n* = 3 *mdx; Mapk3*<sup>-/-</sup>; *Mapk1*<sup>ff</sup> mice and *n* = 4 *mdx; Mapk3*<sup>-/-</sup>; *Mapk1*<sup>ff</sup>-Pax7Cre-ER mice. Significance was determined using a two-tailed unpaired Student's t-test, #*P* = 0.01. **d**, Quantification of the number of myofibers with centrally located nuclei in quad muscle sections from mice of the indicated genotypes. *n* = 3 *mdx; Mapk3*<sup>-/-</sup>; *Mapk1*<sup>ff</sup> mice and *n* = 4 *mdx; Mapk3*<sup>-/-</sup>; *Mapk1*<sup>ff</sup>-Pax7Cre-ER mice. Significance was determined using a two-tailed unpaired Student's t-test, ###*P* < 0.001. **e**, Representative H&E-stained histological sections of the quad muscle from mice of the indicated genotypes. Scale bar = 100 μm. **f**, Minimal feret's myofiber diameter distribution from the quad muscle of 2-month-old mice with the indicated genotypes. *n* = 4 mice per group. A 1-way ANOVA with Tukey's multiple comparisons test was used to determine significance, \**P* < 0.05 vs Wt, #*P* < 0.05 vs *mdx; Mapk3*<sup>-/-</sup>; *Mapk1*<sup>ff</sup>. Data represent mean ± SEM for all graphs.

**a**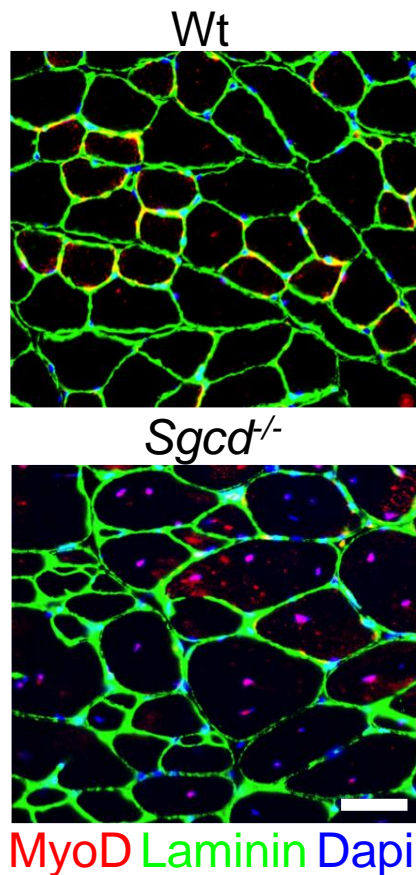**b**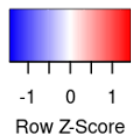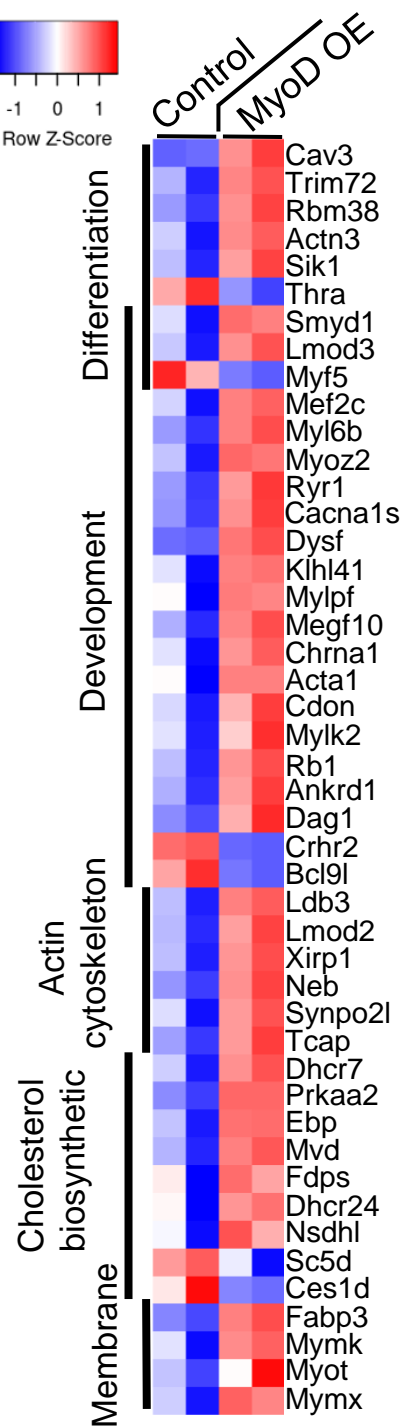**Supplementary Figure 5****c**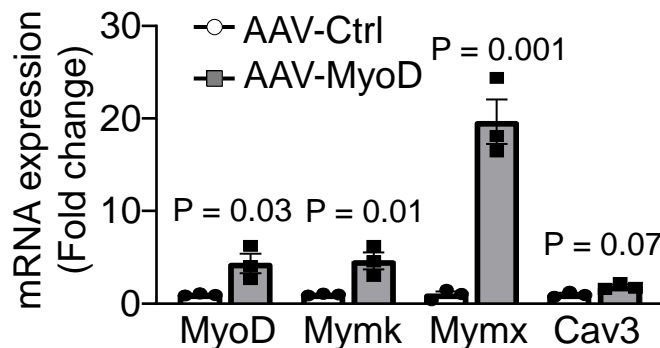**d**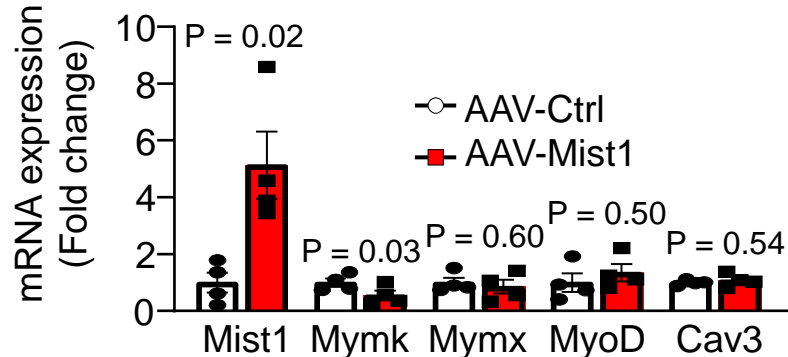



**Supplementary Fig. 5. Analysis of the MyoD-directed muscle fetal gene program.**

**a**, Representative tibialis anterior (TA) muscle sections immunostained for MyoD (red) and laminin (green) in wt and *Sgcd*<sup>-/-</sup> mice at 4 months of age. Dapi stained nuclei are in blue. Scale bar = 100  $\mu$ m. Samples from 3 different mice were analyzed. **b**, Heatmap of selected up-regulated biological categories and dysregulated individual genes from C2C12 cells transduced with a doxycycline-inducible MyoD construct and differentiated for 3 days with or without dox (assayed with Affymetrix microarrays). Individual biological replicates are shown. **c,d**, mRNA gene expression analysis by qPCR for the indicated mRNAs from TA muscle of mice previously infected with AAV-MyoD, AAV-Ctrl or AAV-Mist1. n = 3 mice per group for **c** and n = 4 mice per group for **d**. Significance was determined using a two-tailed Student's t-test. Data represent mean  $\pm$  SEM for all graphs. P values are indicated in panels c and d.
